# Supplementary material for: Analysis of risk factors for lymphatic metastasis in patients diagnosed with early gastric cancer
Source: Research Square preprint supplement (doi:10.21203/rs.3.rs-1565581/v1), 2022-05-06
Supplement: Supplementary file 1 [file c4246e2998d381255136f2d1.xlsx]

## Sheet: Table 3. Univariate analysis of
Table 3. Univariate analysis of risk factors associated with the presence of lymph node metastasis in early gastric cancer patients
	Univariate Analysis
	OR *	CI † 95%	p- Value
Tumor Diameter
≤ 3cm	1
> 3cm	3	1.9-4.8	≤0.001
Differenciation
Differentiated-Type	1
Undifferentiated-Type	1.7	1.1-2.6	0.015
Ulceration
Absent	1
Present	2.4	1.4-3.9	≤0.001
Depth of Invasion
Mucosa	1
Submucosa	6.8	3.6-12.6	≤0.001
Lymphovascular Invasion
Absent	1
Present	65.5	32-133	≤0.001
Perineural Invasion
Absent	1
Present	37.5	10.9-128.9	≤0.001
* OR: Odds Ratio
† CI: Confidence Interval
Depth of Invasion
Mucosa	1
Submucosa	6.8	3.6-12.6	<0.001
