# Supplementary material for: Analysis of risk factors for lymphatic metastasis in patients diagnosed with early gastric cancer
Source: Research Square preprint supplement (doi:10.21203/rs.3.rs-1565581/v1), 2022-05-06
Supplement: Supplementary file 2 [file c97160d8c3298ce018c74dcf.xlsx]

## Sheet: Table 4. Multivariate analysis 
Table 4. Multivariate analysis of risk factors associated with the presence of lymph node metastasis in early gastric cancer patients
	OR *	CI † 95%	p- Value
Tumor Diameter (>3cm)	1.99	1.11-3.85	0.041
Undifferentiated-Type	1.27	0.65-2.47	0.476
Ulceration	1.53	0.72-3.28	0.265
Submucosal Invasion	2.56	1.21-5.45	0.014
Lymphovascular Invasion	40.8	19.1-87.3	≤0.001
Perineural Invasion	21.1	4.77-93.1	≤0.001
* OR: Odds Ratio
† CI: Confidence Interval
